# Supplementary material for: Expression and Kinetics of Endogenous Cannabinoids in the Brain and Spinal Cord of a Spare Nerve Injury (SNI) Model of Neuropathic Pain
Source: MDPI journal article supplement (doi:10.3390/cells11244130), 2022-12-19
Supplement: s1 [file s1]

**Figure S1**

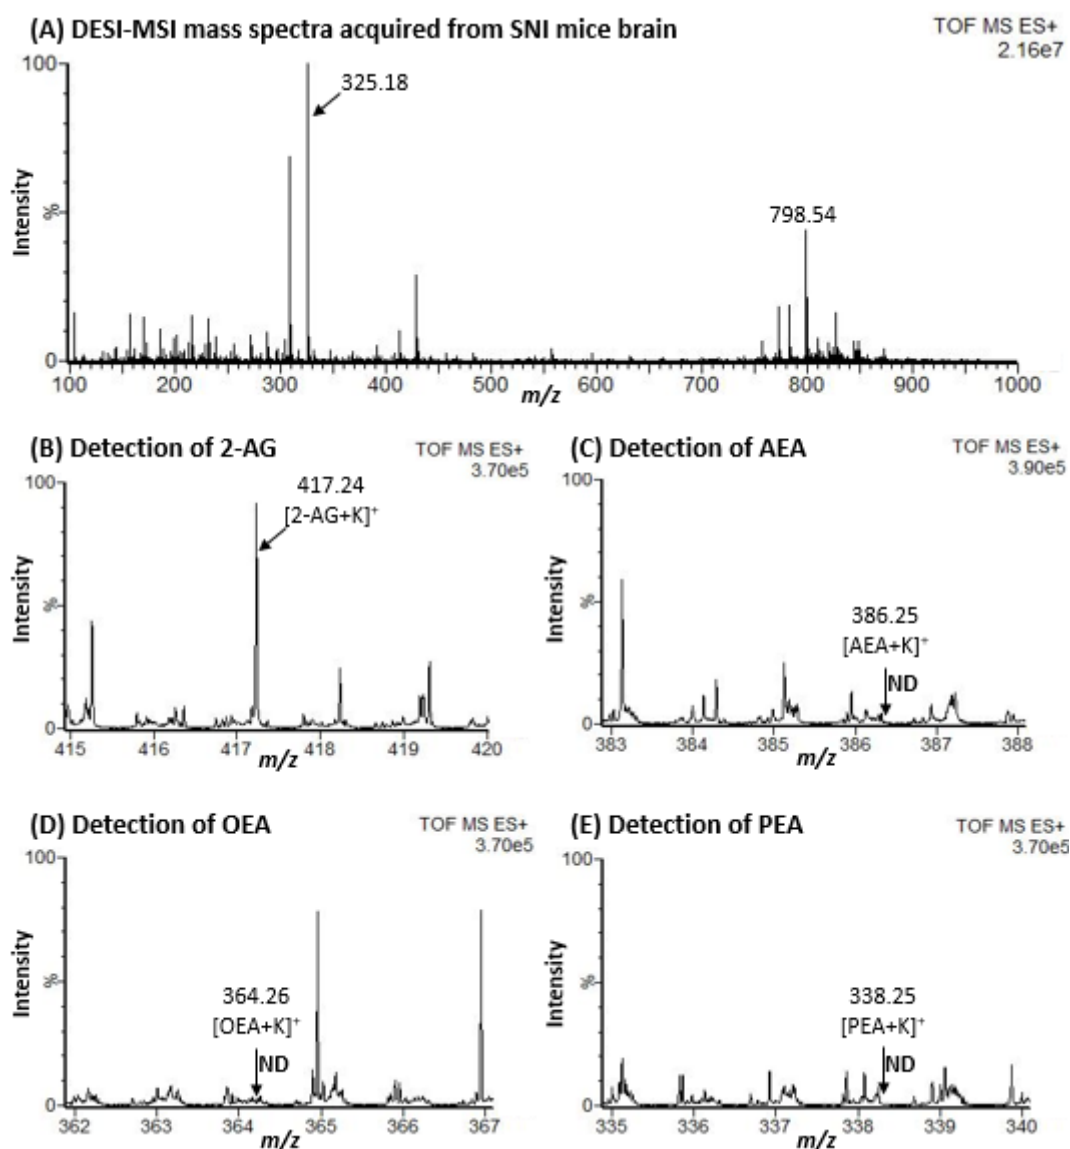

**Figure S1:** DESI-MSI spectra acquired from the coronal section of SNI mice brain. (A) Whole DESI-MSI spectra acquired from SNI mice brain. (B)  $m/z$  peak corresponding to 2-arachidonoylglycerol (2-AG) was detected in DESI-MSI spectra. (C-E)  $m/z$  peaks corresponding to anandamide (AEA), oleoylethanolamide (OEA), and palmitoylethanolamide (PEA) were not detected (ND) in the DESI-MSI spectra.
